# Supplementary material for: Adult neurogenesis through glial transdifferentiation in a CNS injury paradigm
Source: eLife. 2025 Mar 7;13:RP96890. doi: 10.7554/eLife.96890 (PMC11888597; doi:10.7554/eLife.96890)
Supplement: Figure 1—source data 1. [file elife-96890-fig1-data1.xlsx]

## Sheet: EDU+Pros
	Divided ALG	Divided non glial	Divided glia no ALG
sample	No.Repo+Pros+EdU+	No.Pros+EdU+	No.Repo+EdU+		TotalEdU+Repo+	Total EdU+Pros+	TotalDividing colocalizing cells
120717Maria-RepoGFP-EdU-24h-anti-pros.lif - repoGFP-Injured24h-EdU-647-pros-546-1	69	2	1	1	70	71	72
120717Maria-RepoGFP-EdU-24h-anti-pros.lif - repoGFP-Injured24h-EdU-647-pros-546-2	2	18	16	1	18	20	36
120717Maria-RepoGFP-EdU-24h-anti-pros.lif - repoGFP-Injured24h-EdU-647-pros-546-3	3	3	2	1	5	6	8
120717Maria-RepoGFP-EdU-24h-anti-pros.lif - repoGFP-Injured24h-EdU-647-pros-546-4	7	1	4	1	11	8	12
130717Maria-RepoGFP-EdU-24h-anti-pros.lif - repoGFP-EdU-Injured-24h-anti-pros-5merge	0	0	0	1	0	0	0
140717Maria-RepoGFP-EdU-24h-anti-pros.lif - repoGFP-Injured24h-EdU-647-pros-546-6	6	11	10	1	16	17	27
140717Maria-RepoGFP-EdU-24h-anti-pros.lif - repoGFP-Injured24h-EdU-647-pros-546-7	3	1	3	1	6	4	7
140717Maria-RepoGFP-EdU-24h-anti-pros.lif - repoGFP-control24h-EdU-647-pros-546-1	4	0	2	0	6	4	6
140717Maria-RepoGFP-EdU-24h-anti-pros.lif - repoGFP-control24h-EdU-647-pros-546-2	4	1	0	0	4	5	5

## Sheet: FlyFucci 24hACI
Alrm>Fly Fucci 24hACI	No cells RFP+GFP+	R56F03 >Fly Fucci 24hACI	No cells RFP+GFP+
Cntrl 1	13	Cntrl 1	2
Cntrl 2	14	Cntrl 2	2
Cntrl 3	25	Cntrl 3	10
Cntrl 4	23	Cntrl 4	20
Cntrl 5	10	Cntrl 5	4
Cntrl 6	21
INJ 1	20	INJ 1	11
INJ 2	33	INJ 2	11
INJ 3	49	INJ 3	2
INJ 4	41	INJ 4	19
INJ 5	21	INJ 5	7
			22
STATS graphpad
	ALG>GTRACE control	ALG>GTRACE 24h ACI	EG>GTRACE control	EG>GTRACE 24h ACI
Number of values	6	5	5	6
Minimum	10	20	2	2
25% Percentile	12.25	20.5	2	5.75
Median	17.5	33	4	11
75% Percentile	23.5	45	15	19.75
Maximum	25	49	20	22
Mean	17.67	32.8	7.6	12
Std. Deviation	6.121	12.58	7.668	7.43
Std. Error of Mean	2.499	5.625	3.429	3.033
Lower 95% CI of mean	11.24	17.18	-1.921	4.203
Upper 95% CI of mean	24.09	48.42	17.12	19.8
D'Agostino & Pearson omnibus normality test
K2	N too small	N too small	N too small	N too small
P value
Passed normality test (alpha=0.05)?
P value summary
Shapiro-Wilk normality test
W	N too small	N too small	N too small	N too small
P value
Passed normality test (alpha=0.05)?
P value summary
KS normality test
KS distance	0.2254	0.2259	0.2806	0.2202
P value	0.2	0.2	0.2	0.2
Passed normality test (alpha=0.05)?	Yes	Yes	Yes	Yes
P value summary	ns	ns	ns	ns
One sample t test
Theoretical mean	0	0	0	0
Actual mean	17.67	32.8	7.6	12
Discrepancy	-17.67	-32.8	-7.6	-12
95% CI of discrepancy	11,24 to 24,09	17,19 to 48,41	-1,920 to 17,12	4,202 to 19,80
t, df	t=7,070 df=5	t=5,831 df=4	t=2,216 df=4	t=3,956 df=5
P value (two tailed)	0.0009	0.0043	0.091	0.0108
Significant (alpha=0.05)?	Yes	Yes	No	Yes
Sum	106	164	38	72
	Table Analyzed	Paired t test data	Paired t test data	Paired t test data
	Column B	ALG>GTRACE 24h ACI	EG>GTRACE 24h ACI	EG>GTRACE 24h ACI
	vs.	vs,	vs,	vs,
	Column A	ALG>GTRACE control	EG>GTRACE control	ALG>GTRACE 24h ACI
	Unpaired t test
	P value	0.0279	0.3602	0.0076
	P value summary	*	ns	**
	Significantly different? (P < 0.05)	Yes	No	Yes
	One- or two-tailed P value?	Two-tailed	Two-tailed	Two-tailed
	t, df	t=2,618 df=9	t=0,9641 df=9	t=3,418 df=9
	How big is the difference?
	Mean ± SEM of column A	17,67 ± 2,499 N=6	7,600 ± 3,429 N=5	32,80 ± 5,625 N=5
	Mean ± SEM of column B	32,80 ± 5,625 N=5	12,00 ± 3,033 N=6	12,00 ± 3,033 N=6
	Difference between means	15,13 ± 5,780	4,400 ± 4,564	-20,80 ± 6,085
	95% confidence interval	2,057 to 28,21	-5,924 to 14,72	-34,56 to -7,035
	R square	0.4323	0.09362	0.5649
	F test to compare variances
	F,DFn, Dfd	4,222, 4, 5	1,065, 4, 5	2,866, 4, 5
	P value	0.1461	0.9211	0.2786
	P value summary	ns	ns	ns
	Significantly different? (P < 0.05)	No	No	No

## Sheet: Clones 1
	CLONES VS NO CLONES - CHI CUADRADO
	Column analyzed	Column A
	Chi-square test
	Chi-square	6.667
	DF	1
	P value (two-tailed)	0.0098
	P value summary	**
	Is discrepancy significant (P < 0.05)?	Yes
	Outcome	Expected #	Observed #	Expected %	Observed %			Not Injured	Injured
	Con clon	6	11	37.5	68.75		Without clones	68.75	37.5
	Sin clon	10	5	62.5	31.25		With clones	31.25	62.5
	TOTAL	16	16	100	100
	CLONES VS NO CLONES - BINOMIAL
	Column analyzed	Column A
	Binomial test
	P (one-tailed)	0.0112
	P (two-tailed)	0.0169
	P value summary	*
	Is discrepancy significant (P < 0.05)?	Yes
	Outcome	Expected #	Observed #	Expected %	Observed %	95% CI of Observed %
	Con clon	6	11	37.5	68.75	41,34 to 88,98
	Sin clon	10	5	62.5	31.25	11,02 to 58,66
	TOTAL	16	16	100	100

## Sheet: Ts_MARCM
ALG					color
MARCM8 (Confocal 4-11)	CTL1	HS1-INJ-HS2 (6 horas después HS1)	1	Meta	Solo GFP
MARCM8 (Confocal 4-11)	CTL2	HS1-INJ-HS2 (6 horas después HS1)	0	0	0
MARCM8 (Confocal 11-10)	INJ1	HS1-INJ-HS2 (6 horas después HS1)	3	2 Meso, 1 Pro	GFP y RFP
MARCM8 (Confocal 11-10)	INJ2	HS1-INJ-HS2 (6 horas después HS1)	2	Pro y Meso	GFP (pro), GFP-RFP (meso)
MARCM8 (Confocal 11-10)	INJ3	HS1-INJ-HS2 (6 horas después HS1)	0	-	-
MARCM12 (Confocal 4-11)	CTL3	HS1-INJ-HS2 (6 horas después HS1)	1	Meta	GFP y RFP
MARCM12 (Confocal 4-11)	CTL4	HS1-INJ-HS2 (6 horas después HS1)	0	-	-
MARCM12 (Confocal 4-11)	CTL5	HS1-INJ-HS2 (6 horas después HS1)	1	Meso	GFP y RFP
MARCM12 (Confocal 4-11)	INJ4	HS1-INJ-HS2 (6 horas después HS1)	1	Pro	solo GFP
MARCM12 (Confocal 4-11)	INJ5	HS1-INJ-HS2 (6 horas después HS1)	1	Meta	solo GFP
MARCM12 (Confocal 4-11)	INJ6	HS1-INJ-HS2 (6 horas después HS1)	1	Meta	solo GFP
MARCM (Confocal 19-11) - porta 19-11	CTL6	HS1-INJ-HS2 (6 horas después HS1)	1	Entre Meso y Meta	Solo RFP
MARCM (Confocal 19-11) - porta 19-11	CTL7	HS1-INJ-HS2 (6 horas después HS1)	0	-	-
MARCM (Confocal 19-11) - porta 19-11	CTL8	HS1-INJ-HS2 (6 horas después HS1)	0	-	-
MARCM (Confocal 19-11) - porta 19-11	INJ7	HS1-INJ-HS2 (6 horas después HS1)	0	-	-
MARCM (Confocal 19-11) - porta 19-11	INJ8	HS1-INJ-HS2 (6 horas después HS1)	0	-	-
MARCM (Confocal 19-11) - porta 19-11	INJ9	HS1-INJ-HS2 (6 horas después HS1)	1	Meso	Solo GFP
MARCM (Confocal 26-11) - porta 8-11	CTL9	HS1-INJ-HS2 (6 horas después HS1)	0	-
MARCM (Confocal 26-11) - porta 8-11	CTL10	HS1-INJ-HS2 (6 horas después HS1)	0	-
MARCM (Confocal 26-11) - porta 8-11	CTL11	HS1-INJ-HS2 (6 horas después HS1)	1	Meta	RFP
MARCM (Confocal 26-11) - porta 8-11	CTL12	HS1-INJ-HS2 (6 horas después HS1)	2	Meta (a) y meso (b)	GFP
MARCM (Confocal 26-11) - porta 8-11	INJ10	HS1-INJ-HS2 (6 horas después HS1)	0	-	-
MARCM (Confocal 26-11) - porta 8-11	INJ11	HS1-INJ-HS2 (6 horas después HS1)	1	Entre meta y meso	GFP y RFP
MARCM (Confocal 26-11) - porta 8-11	INJ12	HS1-INJ-HS2 (6 horas después HS1)	1	Meta	GFP
MARCM (Confocal 29-11) - porta 29-11	CTL13	HS1-INJ-HS2 (6 horas después HS1)	0	-	-
MARCM (Confocal 29-11) - porta 29-11	CTL14	HS1-INJ-HS2 (6 horas después HS1)	0	-	-
MARCM (Confocal 29-11) - porta 29-11	CTL15	HS1-INJ-HS2 (6 horas después HS1)	0	-	-
MARCM (Confocal 29-11) - porta 29-11	CTL16	HS1-INJ-HS2 (6 horas después HS1)	0	-	-
MARCM (Confocal 29-11) - porta 29-11	INJ13	HS1-INJ-HS2 (6 horas después HS1)	2	Meso y pro	GFP y RFP
MARCM (Confocal 29-11) - porta 29-11	INJ14	HS1-INJ-HS2 (6 horas después HS1)	2	Meso y pro	GFP y RFP, solo GFP (pro)
MARCM (Confocal 29-11) - porta 29-11	INJ15	HS1-INJ-HS2 (6 horas después HS1)	1	Entre meso y pro	GFP y RFP
MARCM (Confocal 29-11) - porta 29-11	INJ16	HS1-INJ-HS2 (6 horas después HS1)	0	-
6h odenado
Muestra	Clones si/no	Nº clones	Localización	Color	Nº células verdes	Superficie (µm^2)	Superficie verde (µm^2)	Superficie roja (µm^2)	Superficie verde/nº células verdes
CTL1	1	1	Metatorácico	GFP	3	17700	17700	0	5900	% clon un solo color/total	71.4286
CTL2	0	0	0	0	0	0	0	0	0	un solo color	5
CTL3	1	1	Metatorácico	GFP y RFP	4	0	0	0	0	total	7
CTL4	0	0	0	0	0	0	0	0	0
CTL5	1	1	Mesotorácico	GFP y RFP	5	34394	28200	6194	5640
CTL6	1	1	Entre meso y metatorácico (cuello)	RFP	0	15900	0	15900	0
CTL7	0	0	0	0	0	0	0	0	0
CTL8	0	0	0	0	0	0	0	0	0
CTL9	0	0	0	0	0	0	0	0	0
CTL10	0	0	0	0	0	0	0	0	0
CTL11	1	1	Metatorácico	RFP	0	6255	0	6255	0
CTL12	1	2	Metatorácico (a)	GFP	2	5402	5402	0	2701
			Mesotorácico (b)	GFP	1	5128	5128	0	5128
CTL13	0	0	0	0	0	0	0	0	0
CTL14	0	0	0	0	0	0	0	0	0
CTL15	0	0	0	0	0	0	0	0	0
CTL16	0	0	0	0	0	0	0	0	0
INJ1	1	3	Mesotorácico	GFP y RFP	3	42400	18400	24000	6133.33	% clon un solo color/total	50
			Mesotorácico	RFP	0	7735	0	7735	0	un solo color	8
			Protorácico	GFP y RFP	4	14077	7146	6931	1786.5	total	16
INJ2	1	2	Protorácico	GFP	1	4440	4440	0	4440
			Mesotorácico	GFP y RFP	4	14980	9899	5081	2474.75
INJ3	0	0	0	0	0	0	0	0	0
INJ4	1	1	Protorácico	GFP	2	5823	5823	0	2911.5
INJ5	1	1	Metatorácico	GFP	4	12300	12300	0	3075
INJ6	1	1	Metatorácico	GFP	2	6393	6393	0	3196.5
INJ7	0	0	0	0	0	0	0	0	0
INJ8	0	0	0	0	0	0	0	0	0
INJ9	1	1	Mesotorácico	GFP	1	2086	2086	0	2086
INJ10	0	0	0	0	0	0	0	0	0
INJ11	1	1	Entre meso y metatorácico (cuello)	GFP y RFP	11	51500	26000	25500	2363.64
INJ12	1	1	Metatorácico	GFP	5	18200	18200	0	3640
INJ13	1	2	Mesotorácico	GFP y RFP	1	5307	2435	2872	2435
			Protorácico	GFP y RFP	1	34760	5160	29600	5160
INJ14	1	2	Mesotorácico	GFP y RFP	8	47700	20300	27400	2537.5
			Protorácico	GFP	1	4484	4484	0	4484
INJ15	1	1	Entre meso y protorácico	GFP y RFP	9	43456	37400	6056	4155.56
INJ16	0	0	0	0	0	0	0	0	0
19h ALG
Muestra		Protocolo	Nº clones	Posición	Color	Tamaño clon	Nº células clon
MARCM6 (Confocal 9-10)	CTL1	HS1-INJ-HS2 (19 horas después HS1)	0	-	-		0
MARCM6 (Confocal 9-10)	CTL2	HS1-INJ-HS2 (19 horas después HS1)	0	-	-		0
MARCM6 (Confocal 9-10)	INJ1	HS1-INJ-HS2 (19 horas después HS1)	2	Pro y Meso	GFP-RFP (Pro), RFP (meso)		2 verdes/2 rojas 1 roja
MARCM6 (Confocal 9-10)	INJ2	HS1-INJ-HS2 (19 horas después HS1)	1	Meta	GFP-RFP		1 verde/1 roja
MARCM6 (Confocal 9-10)	INJ3	HS1-INJ-HS2 (19 horas después HS1)	1	Pro	GFP-RFP		1 verde/1 roja
MARCM6 (Confocal 9-10)	INJ4	HS1-INJ-HS2 (19 horas después HS1)	1	Meta	GFP-RFP		1 verde/1 roja
MARCM6 (Confocal 9-10)	INJ5	HS1-INJ-HS2 (19 horas después HS1)	1	Enorme (Meta)	GFP-RFP		40 verdes/52 rojas
MARCM6 (Confocal 9-10)	INJ6	HS1-INJ-HS2 (19 horas después HS1)	0	-	-		0
MARCM6 (Confocal 9-10)	INJ7	HS1-INJ-HS2 (19 horas después HS1)	0	-	-		0

## Sheet: MARCM con U-p35
MARCM clones generados en tubG80alrmG4-Up35 24hACI 2HS el primer antes injury y el segundo 6hACI
	manchas verdes	manchas rojas	un solo color	dos colores	con algun clon
20201013-pos13	0	0
20201013-pos12	0	0
20201013-pos11	5	4		1	1
20201013-pos10	1	0 o varias		1	1												% sigle color clones	control	UAS p35
20201013-pos9	1	2		1	1													50	0
20201013-pos8	1	1		1	1													60	33.333
20201013-pos7	3	3		1	1													55	0
20201013-pos6	1	2 o 3		1	1														16.6666
20201013-pos5	mas de 4	4		1	1
20201013-pos4	0	0				% clon un solo color/total	0										T-test	0.00885706
20201013-pos3	3	4		1	1	un solo color	0
20201013-pos2	0	0				total	8		Exp	control
20201013-pos1	0	0							0	50
20201014-pos1				1	1	% clon un solo color/total	33.3333		33.3333	60
20201014-pos2				1	1	un solo color	1		0
20201014-pos3	2 0 3	2	1		1	total	3		16.6667
20201023-pos1	complementaria a la gigante	1 gigante		1	1
20201023-pos2	complementaria a la gigante	1 gigante		1	1
20201023-pos3	3 o 0	2 0 3				no se sabe							Not injured Control	Injury Control	Injury ALG>p35
20201023-pos4	2	2		1	1							%	70	55	12.5
20201023-pos5	2	5		1	1							devEst		7.07107	15.9571
20201023-pos6	mazo	mazo +1		1	1	% clon un solo color/total	0
20201023-pos7	5 o 1	3 o 1		1	1	un solo color	0		%	devEst
20201023-pos8	0	0		0	0	total	6	media de %s	12.5	15.9571
20201028-pos7	6	2 o 0				no se sabe			55	7.07107
20201028-pos6	1 o 2	1 o 2		1	1
20201028-pos5	1	0	1		1			TOTAL
20201028-pos4	4	6	0	1	1			% clon un solo color/total	8.69565									Injured Control	Injured ALG>p35
20201028-pos3	3	3	0	1	1	% clon un solo color/total	16.6667	un solo color	2								% Single-color clones	55	12.5
20201028-pos2	2	2	0	1	1	un solo color	1	total	23								devEst	7.07107	15.9571
20201028-pos1	3	2	0	1	1	total	6
	manchas verdes	manchas rojas	un solo color	dos colores	con algun clon
						% clon un solo color/total	60
20201023-pos5 control		1	1		1	un solo color	3
20201023-pos4 control	2 o 3		1		1	total	5
20201023-pos3 control	3	2 0 3		1	1
20201023-pos2 control	2	11		1	1
20201023-pos1 control		4 o ninguna	1		1	controles de nuria
20201028- control	0	0	0	0		% clon un solo color/total	50
	manchas verdes	manchas rojas	un solo color	dos colores	con algun clon	un solo color	8
						total	16

## Sheet: Clones 24h
Muestra	Clones si/no
CTL1	1
CTL2	0		CLONES VS NO CLONES - CHI CUADRADO
CTL3	1		Column analyzed	Column A
CTL4	0
CTL5	1		Chi-square test
CTL6	1		Chi-square	6.667
CTL7	0		DF	1
CTL8	0		P value (two-tailed)	0.0098
CTL9	0		P value summary	**
CTL10	0		Is discrepancy significant (P < 0.05)?	Yes
CTL11	1									1 Day-old Flies		7 Day -old flies
CTL12	1		Outcome	Expected #	Observed #	Expected %	Observed %			Not Injured	Injured	Not Injured	Injured
			Con clon	6	11	37.5	68.75		With clones	31.25	62.5	28.57	50
CTL13	0		Sin clon	10	5	62.5	31.25		Without clones	68.75	37.5	71.43	50
CTL14	0		TOTAL	16	16	100	100
CTL15	0
CTL16	0
INJ1	1
INJ2	1
INJ3	0
INJ4	1
INJ5	1
INJ6	1
INJ7	0
INJ8	0
INJ9	1
INJ10	0
INJ11	1
INJ12	1
INJ13	1
INJ14	1
INJ15	1
INJ16	0

## Sheet: clones 7 days
Muestra	Clones si/no
CTL1	0
CTL2	1
CTL3	0
CTL4	0
CTL5	0		Outcome	Expected #	Observed #	Expected %	Observed %			Not Injured	Injured
CTL6	0		Con clon	2	5	28.57	50		With clones	28.57	50
CTL7	1		Sin clon	5	5	71.43	50		Without clones	71.43	50
INJ1 (1+2)	1		TOTAL	7	10	100	100
INJ2 (3)	1
INJ3 (4+7)	0
INJ4 (5+6)	1
INJ5 (8)	1
INJ6 (9)	1
INJ7	0
INJ8	0
INJ9	0
INJ10	0
