# Supplementary material for: Adult neurogenesis through glial transdifferentiation in a CNS injury paradigm
Source: eLife. 2025 Mar 7;13:RP96890. doi: 10.7554/eLife.96890 (PMC11888597; doi:10.7554/eLife.96890)
Supplement: Figure 2—source data 1. [file elife-96890-fig2-data1.xlsx]

## Sheet: G-trace NP-like
No GFP+ RFP- "NP-like" 6h ACI					NP-like cells 24h ACI
Alrm		R56F03			Alrm		R56F03
NI	I	NI	I		NI	I	NI	I
0	2	51	84		1	7	43	43
1	0	45	35		0	3	43	46
0	0	19	29		0	0	35	16
1	0	13	41		0	1	4	27
1	0	54	22		1	0	23
2	6	20	101		1	2	26
1		54	83		1	1	65
		80	69		1	1	40
		34			1	1
0.857143	1.33333	41.1111	58		0.666667	1.77778	34.875	33
No GFP+ RFP-VC cells 6hACI					No GFP+ RFP-VC cells 24hACI
Alrm		R56F03			Alrm		R56F03
NI	I	NI	I		NI	I	NI	I
0	22	11	0		23	43	21	27
12	0	17	16		22	4	7	15
0	31	11	10		9	19	9	43
30	30	7	15		19	41	29	32
1	50	4	5		10	15	19
29	56	0	26		19	48	6
31		12	21		14	43	3
		16	16		18	35	14
		11			14	40
					16.4444	32
20190627	RFP+ cells	Np-like	% del promedio
R56F03-G-trace-24ACI NOinj pos1	472	43	9.31889
R56F03-G-trace-24ACI NOinj pos2	458	43	9.31889
R56F03-G-trace-24ACI NOinj pos3	491	35	7.58514					Graphpad STATS
R56F03-G-trace-24ACI NOinj pos5	458	4	0.866873
R56F03-G-trace-24ACI NOinj pos6	414	23	4.98452						ALG>GTRACE control	ALG>GTRACE 24h ACI	EG>GTRACE control	EG>GTRACE 24h ACI
R56F03-G-trace-24ACI NOinj pos8	445	26	5.63467					Number of values	9	9	8	4
R56F03-G-trace-24ACI NOinj pos11	492	65	14.0867
		40	8.66873					Minimum	0	0	4	16
promedio	461.429	34.1429	7.39938					25% Percentile	0	0.5	23.75	18.75
DevEst	27.2755	17.8841	3.8758					Median	1	1	37.5	35
								75% Percentile	1	2.5	43	45.25
								Maximum	1	7	65	46
12032019 (confo sergio)	No. Red total	Np-like	% del promedio					Mean	0.6667	1.778	34.88	33
Injury 8	1251	7	0.559552					Std. Deviation	0.5	2.167	17.88	14.07
INJ series 10	1191	3	0.239808					Std. Error of Mean	0.1667	0.7222	6.323	7.036
INJ series 13	1216	0	0
INJ series 15	1251	1	0.0799361					Lower 95% CI of mean	0.2823	0.1123	19.92	10.61
INJ series 17	1108	0	0					Upper 95% CI of mean	1.051	3.443	49.83	55.39
INJ series 19	1158	2	0.159872
INJ series 21	1103	1	0.0799361					D'Agostino & Pearson omnibus normality test
		1	0.0799361					K2	3.85	13.48	0.6917	N too small
		1	0.0799361					P value	0.1459	0.0012	0.7076
			0					Passed normality test (alpha=0.05)?	Yes	No	Yes
NOT inj 2	1262	1	0.0799361					P value summary	ns	**	ns
NOT inj 4	1165	0	0
NOT inj 6	1172	0	0					Shapiro-Wilk normality test
NOT inj 8	1185	0	0					W	0.6173	0.7456	0.9655	N too small
		1	0.0799361					P value	0.0002	0.0048	0.8608
		1	0.0799361					Passed normality test (alpha=0.05)?	No	No	Yes
		1	0.0799361					P value summary	***	**	ns
		1	0.0799361
		1	0.0799361					KS normality test
promedio	1187.45	1.22222	0.102928					KS distance	0.4142	0.3069	0.1998	N too small
DevEst	54.3348	1.62899	0.128516					P value	< 0,0001	0.0145	0.2
								Passed normality test (alpha=0.05)?	No	No	Yes
								P value summary	****	*	ns
		% ALG into NP from total ALG	% EG into NP from total EG
Grafico porcentajes	Mean	0.102928	7.39938					One sample t test
	DT	0.128516	3.8758					Theoretical mean	0	0	0	0
								Actual mean	0.6667	1.778	34.88	33
								Discrepancy	-0.6667	-1.778	-34.88	-33
								95% CI of discrepancy	0,2823 to 1,051	0,1123 to 3,443	19,92 to 49,83	10,61 to 55,39
								t, df	t=4,000 df=8	t=2,462 df=8	t=5,516 df=7	t=4,690 df=3
								P value (two tailed)	0.0039	0.0392	0.0009	0.0183
								Significant (alpha=0.05)?	Yes	Yes	Yes	Yes
								Sum	6	16	279	132
								Table Analyzed	Paired t test data	Paired t test data
								Column B	ALG>GTRACE 24h ACI	EG>GTRACE 24h ACI
								vs.	vs,	vs,
								Column A	ALG>GTRACE control	EG>GTRACE control
								Mann Whitney test
								P value	0.2968	0.9354
								Exact or approximate P value?	Exact	Exact
								P value summary	ns	ns
								Significantly different? (P < 0.05)	No	No
								One- or two-tailed P value?	Two-tailed	Two-tailed
								Sum of ranks in column A,B	72,00 , 99,00	51,00 , 27,00
								Mann-Whitney U	27	15
								Difference between medians
								Median of column A	1	37.5
								Median of column B	1	35
								Difference: Actual	0	-2.5
								Difference: Hodges-Lehmann	0	0.5
