# Supplementary material for: Adult neurogenesis through glial transdifferentiation in a CNS injury paradigm
Source: eLife. 2025 Mar 7;13:RP96890. doi: 10.7554/eLife.96890 (PMC11888597; doi:10.7554/eLife.96890)
Supplement: Figure 3—source data 1. [file elife-96890-fig3-data1.xlsx]

## Sheet: EG NP-like prosRNAi
	Injury control	stem-like total	stem-like pros-	stem-like pros+	Np-like total	Np-like pros-	Np-like pros+	stem+np	stem+np pros+	%pros+ en stem	%pros+ en NP	%pros total					control	EG>prosRNAi														control	EG>prosRNAi
	20190703 maria R56F03-G-trace-injury 22hACI anti-pros.lif - Mark_and_Find_001/Pos006_S001	44	39	5	21	13	8	65	13	0.113636	0.380952	0.2				Number of values	6	5													Number of values	6	5
	20190703 maria R56F03-G-trace-injury 22hACI anti-pros.lif - Mark_and_Find_001/Pos005_S001	37	30	7	34	21	13	71	20	0.189189	0.382353	0.28169
	20190703 maria R56F03-G-trace-injury 22hACI anti-pros.lif - Mark_and_Find_001/Pos004_S001	27	23	4	37	26	11	64	15	0.148148	0.297297	0.234375				Minimum	21,00	8,000													Minimum	7,000	22,00
	20190703 maria R56F03-G-trace-injury 22hACI anti-pros.lif - Mark_and_Find_001/Pos003_S001	7	6	1	31	22	9	38	10	0.142857	0.290323	0.263158				25% Percentile	26,25	11,00													25% Percentile	13,75	23,50
	20190703 maria R56F03-G-trace-injury 22hACI anti-pros.lif - Mark_and_Find_001/Pos002_S001	16	14	2	44	32	12	60	14	0.125	0.272727	0.233333				Median	32,50	17,00													Median	27,00	25,00
	20190703 maria R56F03-G-trace-injury 22hACI anti-pros.lif - Mark_and_Find_001/Pos001_S001	27	21	6	28	21	7	55	13	0.222222	0.25	0.236364				75% Percentile	38,75	28,50													75% Percentile	38,75	37,50
	mean	26.3333	22.1667	4.16667	32.5	22.5	10	58.8333	14.1667	0.156842	0.312275	0.241487				Maximum	44,00	30,00													Maximum	44,00	41,00
	sd	13.471	11.6175	2.31661	7.86766	6.2849	2.36643	11.5138	3.3116	0.0411648	0.0561711	0.0281084
	Injury pors RNAi															Mean	32,50	19,20													Mean	26,33	29,40
	20190703 maria R56F03-G-trace prosRNAi injury 22hACI anti-pros.lif - Mark_and_Find_001/Pos005_S001	34	28	6	30	24	6	64	12	0.176471	0.2	0.1875				Std. Deviation	7,868	9,149			Table Analyzed	Data 1									Std. Deviation	13,47	7,893			Table Analyzed	stem-like
	20190703 maria R56F03-G-trace prosRNAi injury 22hACI anti-pros.lif - Mark_and_Find_001/Pos004_S001	22	20	2	14	10	4	36	6	0.0909091	0.285714	0.166667				Std. Error	3,212	4,091			Column A	control									Std. Error	5,499	3,530			Column A	control
	20190703 maria R56F03-G-trace prosRNAi injury 22hACI anti-pros.lif - Mark_and_Find_001/Pos003_S001	41	31	10	17	14	3	58	13	0.243902	0.176471	0.224138									vs	vs														vs	vs
	20190703 maria R56F03-G-trace prosRNAi injury 22hACI anti-pros.lif - Mark_and_Find_001/Pos002_S001	25	24	1	27	18	9	52	10	0.04	0.333333	0.192308				Lower 95% CI of mean	24,24	7,840			Column B	EG>prosRNAi									Lower 95% CI of mean	12,20	19,60			Column B	EG>prosRNAi
	20190703 maria R56F03-G-trace prosRNAi injury 22hACI anti-pros.lif - Mark_and_Find_001/Pos001_S001	25	21	4	8	8	0	33	4	0.16	0	0.121212				Upper 95% CI of mean	40,76	30,56													Upper 95% CI of mean	40,47	39,20
	mean	29.4		4.6	19.2		4.4	48.6	9	0.142256	0.199104	0.178365									Unpaired t test															Unpaired t test
	sd	7.89303	4.65833	3.57771	9.14877	6.41872	3.36155	13.5941	3.87298	0.078915	0.128135	0.038001				KS normality test					P value	0,0289									KS normality test					P value	0,6656
	t-test	0.651062	0.627284	0.822674	0.0337609	0.0781536	0.0164398	0.219927	0.0466249	0.722338	0.123133	0.0170398				KS distance	0,1170	0,2030			P value summary	*									KS distance	0,1864	0,3114			P value summary	ns
																P value	P > 0.10	P > 0.10			Are means signif. different? (P < 0.05)	Yes									P value	P > 0.10	P > 0.10			Are means signif. different? (P < 0.05)	No
				Np-like total (INJURY)					Np-like total							Passed normality test (alpha=0.05)?	Yes	Yes			One- or two-tailed P value?	Two-tailed									Passed normality test (alpha=0.05)?	Yes	Yes			One- or two-tailed P value?	Two-tailed
				control	prosRNAi				control	prosRNAi						P value summary	ns	ns			t, df	t=2.596 df=9									P value summary	ns	ns			t, df	t=0.4468 df=9
				21	30			mean	32.5	19.2
				34	14			sd	7.86766	9.14877						D'Agostino & Pearson omnibus normality test					How big is the difference?										D'Agostino & Pearson omnibus normality test					How big is the difference?
				37	17											K2	N too small	N too small			Mean ± SEM of column A	32.50 ± 3.212 N=6									K2	N too small	N too small			Mean ± SEM of column A	26.33 ± 5.499 N=6
				31	27											P value					Mean ± SEM of column B	19.20 ± 4.091 N=5									P value					Mean ± SEM of column B	29.40 ± 3.530 N=5
				44	8			STEM-like total (INJURY)								Passed normality test (alpha=0.05)?					Difference between means	13.30 ± 5.123									Passed normality test (alpha=0.05)?					Difference between means	-3.067 ± 6.864
				28				control	prosRNAi							P value summary					95% confidence interval	1.711 to 24.89									P value summary					95% confidence interval	-18.59 to 12.46
		mean		32.5	19.2			44	34												R squared	0,4282														R squared	0,02170
		sd		7.86766	9.14877			37	22							Shapiro-Wilk normality test															Shapiro-Wilk normality test
		t-test		0.0337609				27	41							W	N too small	N too small			F test to compare variances										W	N too small	N too small			F test to compare variances
								7	25							P value					F,DFn, Dfd	1.352, 4, 5									P value					F,DFn, Dfd	2.913, 5, 4
								16	25							Passed normality test (alpha=0.05)?					P value	0,7354									Passed normality test (alpha=0.05)?					P value	0,3224
								27								P value summary					P value summary	ns									P value summary					P value summary	ns
																					Are variances significantly different?	No														Are variances significantly different?	No
																Sum	195,0	96,00													Sum	158,0	147,0
		stem-like total		stem-like pros+	Np-like total		Np-like pros+	stem+np	stem+np pros+	%pros+ en stem	%pros+ en NP	%pros total
	NOT injured
	Counter Window - 20190627maria R56F03-G-trace 24hACI NOInj-anti-pros.lif - Mark_and_Find_001/Pos011_S001	4	4	0	33	26	7	37	7	0	0.212121	0.189189			Stem-like cells
	Counter Window - 20190627maria R56F03-G-trace 24hACI NOInj-anti-pros.lif - Mark_and_Find_001/Pos01_S001	6	6	0	29	19	10	35	10	0	0.344828	0.285714			Not Injured		Injured
	Counter Window - 20190627maria R56F03-G-trace 24hACI NOInj-anti-pros.lif - Mark_and_Find_001/Pos02_S001	0	0	0	3	0	3	3	3	-	1	1			Total	Pros +	Total	Pros +
	Counter Window - 20190627maria R56F03-G-trace 24hACI NOInj-anti-pros.lif - Mark_and_Find_001/Pos03_S001	0	0	0	2	1	1	2	1	-	0.5	0.5		mean	4.125	0.125	15.9	2
	Counter Window - 20190627maria R56F03-G-trace 24hACI NOInj-anti-pros.lif - Mark_and_Find_001/Pos04_S001	11	11	0	54	46	8	65	8	0	0.148148	0.123077		sd	5.08324	0.353553	11.4353	1.76383
	Counter Window - 20190627maria R56F03-G-trace 24hACI NOInj-anti-pros.lif - Mark_and_Find_001/Pos05_S001	12	11	1	39	30	9	51	10	0.0833333	0.230769	0.196078		t-test INJ vs NI	0.0120527	0.00840131
	Counter Window - 20190627maria R56F03-G-trace 24hACI NOInj-anti-pros.lif - Mark_and_Find_001/Pos06_S001	0	0	0	2	1	1	2	1	-	0.5	0.5
	Counter Window - 20190627maria R56F03-G-trace 24hACI NOInj-anti-pros.lif - Mark_and_Find_001/Pos08_S001	0	0	0	2	0	2	2	2	-	1	1
	mean	4.125	4	0.125	20.5	15.375	5.125	24.625	5.25	0.0208333	0.491983	0.474257
	sd	5.08324	4.86973	0.353553	20.7915	17.582	3.75832	25.6066	3.91882	0.0416667	0.338637	0.352878
	injured	stem-like total		stem-like pros+	Np-like total		Np-like pros+	stem+np	stem+np pros+	%pros+ en stem	%pros+ en NP	%pros total
	20190627maria R56F03-G-trace 24hACI Injury-anti-pros.lif - Mark_and_Find_001/Pos001	26	23	3	60	41	19	86	22	0.115385	0.316667	0.255814				Not Injured		Injured
	20190627maria R56F03-G-trace 24hACI Injury-anti-pros.lif - Mark_and_Find_001/Pos002	0	0	0	4	1	3	4	3	0	0.75	0.75				% Pros+ en Stem	% pros+ en NP	% Pros+ en Stem	% pros+ en NP
	20190627maria R56F03-G-trace 24hACI Injury-anti-pros.lif - Mark_and_Find_001/Pos003	2	0	2	2	1	1	4	3	1	0.5	0.75			mean	0.0208333	0.491983	0.17639	0.305889
	20190627maria R56F03-G-trace 24hACI Injury-anti-pros.lif - Mark_and_Find_001/Pos004	33	27	6	70	55	15	103	21	0.181818	0.214286	0.203883			sd	0.0416667	0.338637	0.295768	0.233562
	20190627maria R56F03-G-trace 24hACI Injury-anti-pros.lif - Mark_and_Find_001/Pos005	22	20	2	27	21	6	49	8	0.0909091	0.222222	0.163265			t-test INJ vs NI	0.136058	0.210552
	20190627maria R56F03-G-trace 24hACI Injury-anti-pros.lif - Mark_and_Find_001/Pos006	0	0	0	10	4	6	10	6	0	0.6	0.6
	20190627maria R56F03-G-trace 24hACI Injury-anti-pros.lif - Mark_and_Find_001/Pos007	21	20	1	52	43	9	73	10	0.047619	0.173077	0.136986
	20190627maria R56F03-G-trace 24hACI Injury-anti-pros.lif - Mark_and_Find_001/Pos008	19	16	3	27	25	2	46	5	0.157895	0.0740741	0.108696
	20190627maria R56F03-G-trace 24hACI Injury-anti-pros.lif - Mark_and_Find_001/Pos009	17	15	2	23	20	3	40	5	0.117647	0.130435	0.125
	20190627maria R56F03-G-trace 24hACI Injury-anti-pros.lif - Mark_and_Find_001/Pos010	19	18	1	64	59	5	83	6	0.0526316	0.078125	0.0722892
	mean	15.9	13.9	2	33.9	27	6.9	49.8	8.9	0.17639	0.305889	0.316593
	sd	11.4353	10.1702	1.76383	25.6361	21.6795	5.87745	36.0117	6.96738	0.295768	0.233562	0.272393
	t-test	0.0120527	0.0172613	0.00840131	0.238505	0.227096	0.449004	0.10298	0.181716	0.136058	0.210552	0.317364
		injured 20190703 vs 20190627			lo de arriba
		stem-like total		stem-like pros+
		44		5
		37		7
		27		4
		7		1
		16		2
		27		6
		0.146327		0.08175
