# Supplementary material for: Adult neurogenesis through glial transdifferentiation in a CNS injury paradigm
Source: eLife. 2025 Mar 7;13:RP96890. doi: 10.7554/eLife.96890 (PMC11888597; doi:10.7554/eLife.96890)
Supplement: Figure 4—source data 1. [file elife-96890-fig4-data1.xlsx]

## Sheet: No VC cells joung flies
	REPO
	stem-like	Np-like	stem-like
20191030maria repo-G-trace 24hACI anti-Dpn fr-dpi-Ch1, Ch2-Dpn, Ch3-GFP,Ch4-RFP.lif - No injury/Pos006_S001	8
20191030maria repo-G-trace 24hACI anti-Dpn fr-dpi-Ch1, Ch2-Dpn, Ch3-GFP,Ch4-RFP.lif - No injury/Pos005_S001	9	1
0191030maria repo-G-trace 24hACI anti-Dpn fr-dpi-Ch1, Ch2-Dpn, Ch3-GFP,Ch4-RFP.lif - No injury/Pos004_S001	6	tincion fea
0191030maria repo-G-trace 24hACI anti-Dpn fr-dpi-Ch1, Ch2-Dpn, Ch3-GFP,Ch4-RFP.lif - No injury/Pos003_S001	4	tincion fea
0191030maria repo-G-trace 24hACI anti-Dpn fr-dpi-Ch1, Ch2-Dpn, Ch3-GFP,Ch4-RFP.lif - No injury/Pos001_S001	7
Counter Window - 20191030maria repo-G-trace 24hACI anti-Dpn fr-dpi-Ch1, Ch2-Dpn, Ch3-GFP,Ch4-RFP.lif - 24hACI/Pos008_S001	24	tincion fea
Counter Window - 20191030maria repo-G-trace 24hACI anti-Dpn fr-dpi-Ch1, Ch2-Dpn, Ch3-GFP,Ch4-RFP.lif - 24hACI/Pos007_S001	17		4 o mas
Counter Window - 20191030maria repo-G-trace 24hACI anti-Dpn fr-dpi-Ch1, Ch2-Dpn, Ch3-GFP,Ch4-RFP.lif - 24hACI/Pos005_S001	18		a lomejor 7
Counter Window - 20191030maria repo-G-trace 24hACI anti-Dpn fr-dpi-Ch1, Ch2-Dpn, Ch3-GFP,Ch4-RFP.lif - 24hACI/Pos004_S001	15		a lo mejor
Counter Window - 20191030maria repo-G-trace 24hACI anti-Dpn fr-dpi-Ch1, Ch2-Dpn, Ch3-GFP,Ch4-RFP.lif - 24hACI/Pos002_S001	19		puede
	stem like
	NotINJ	24hACI
mean	6.8	18.6
est dev	1.92354	3.36155
t-test, p=	0.000380348
		Minimum	4,000	15,00		Table Analyzed	Stem-like GFP+RFP-
		25% Percentile	5,000	16,00		Column A	Control
		Median	7,000	18,00		vs	vs
		75% Percentile	8,500	21,50		Column B	24h ACI
		Maximum	9,000	24,00
						Unpaired t test
		Mean	6,800	18,60		P value	0,0001
		Std. Deviation	1,924	3,362		P value summary	***
		Std. Error	0,8602	1,503		Are means signif. different? (P < 0.05)	Yes
						One- or two-tailed P value?	Two-tailed
		Lower 95% CI of mean	4,412	14,43		t, df	t=6.813 df=8
		Upper 95% CI of mean	9,188	22,77
						How big is the difference?
		KS normality test				Mean ± SEM of column A	6.800 ± 0.8602 N=5
		KS distance	0,1414	0,2526		Mean ± SEM of column B	18.60 ± 1.503 N=5
		P value	P > 0.10	P > 0.10		Difference between means	-11.80 ± 1.732
		Passed normality test (alpha=0.05)?	Yes	Yes		95% confidence interval	-15.79 to -7.806
		P value summary	ns	ns		R squared	0,8530
		D'Agostino & Pearson omnibus normality test				F test to compare variances
		K2	N too small	N too small		F,DFn, Dfd	3.054, 4, 4
		P value				P value	0,3050
		Passed normality test (alpha=0.05)?				P value summary	ns
		P value summary				Are variances significantly different?	No
		Shapiro-Wilk normality test
		W	N too small	N too small
		P value
		Passed normality test (alpha=0.05)?
		P value summary
		Sum	34,00	93,00
	EG o ALG
	Alrm			R56
	NI	I		NI	I
	23	43		21	27
	22	4		7	15
	9	19		9	43
	19	41		29	32
	10	15		19
	19	48		6
	14	43		3
	18	35		14
	14	40
		32

## Sheet: No VC cel EG o ALG mature flies
confo	No. Stem-like					ALG no INJ	ALG INJ		EG no INJ	EG INJ
20200611maria alrm-Gtrace 10-12 days at17-24h notINJ						4	14		4	8
						3	11		7	18
pos2	4					1	37		6	12
pos10	3					3	15		7	27
pos9	1					4	17		6	11
pos8	3					2	30		9	20
pos7	4					5	12		4	28
pos6	2					1	5		3	19
pos5	5						15		5	21
pos4	1									12
20200611maria alrm-Gtrace 10-12 days at17-24h INJURY						ALG no INJ	ALG INJ		EG no INJ	EG INJ
pos10	14				mean	2.875	17.3333		5.66667	17.6
pos9	11				DevEst	1.45774	9.9373		1.87083	6.78561
pos8	37				T-Test		0.00230239			0.000277992
pos7	15
pos6	17
pos5	30
pos4	12
pos3	5
pos2	15
pos1
20200528maria R56F03-Gtrace 10-12 days at17-24h INJ
pos11	8
pos10	18
pos9	12
pos8	27
pos7	11
pos6	20
pos5	28
pos4	19
pos3	21
pos2	12
pos1
20200528maria R56F03-Gtrace 10-12 days at17-24h not INJ
pos10	4
pos9	7
pos8	6
pos7	7
pos6	6
pos5	roto
pos4	9
pos3	4
pos2	3
pos1	5
